# Supplementary material for: Physiological Functions of the Cello-Oligosaccharides Binding CebE in the Pathogenic Streptomyces sp. AMCC400023
Source: MDPI journal article supplement (doi:10.3390/microorganisms12030499), 2024-02-29
Supplement: s1 [file s1]

## SUPPLEMENTARY INFORMATION

### SUPPLEMENTARY TABLES AND FIGURES

**TABLE S1.** The amino acid sequence identity of protein used in the phylogenetic tree.

|                      | <b>CebE_griseus</b> | <b>CebE_reticuli</b> | <b>SCO2795</b> | <b>SCO7555</b> | <b>SCAB_2421</b> | <b>SCAB_15521</b> | <b>SCAB_57751</b> | <b>SCAB_77271</b> | <b>GEO1108</b> | <b>GEO5601</b> | <b>GEO7671</b> |
|----------------------|---------------------|----------------------|----------------|----------------|------------------|-------------------|-------------------|-------------------|----------------|----------------|----------------|
| <b>CebE_griseus</b>  | 100                 | 47.99                | 46.28          | 49.4           | 47.79            | 34.55             | 47.09             | 39.76             | 34.47          | 48,05          | 39.76          |
| <b>CebE_reticuli</b> |                     | 1000                 | 51.38          | 45.61          | 45.75            | 32.51             | 46.83             | 36.02             | 32.05          | 79.05          | 36.56          |
| <b>SCO2795</b>       |                     |                      | 100            | 47.95          | 47.21            | 29.41             | 71.39             | 33.48             | 29.19          | 51.58          | 34.8           |
| <b>SCO7555</b>       |                     |                      |                | 100            | 90.59            | 33.1              | 47.46             | 36.22             | 33.1           | 45.25          | 35.95          |
| <b>SCAB_2421</b>     |                     |                      |                |                | 100              | 32.33             | 46.19             | 35.14             | 32.08          | 46.06          | 35.41          |
| <b>SCAB_15521</b>    |                     |                      |                |                |                  | 100               | 30.47             | 29.92             | 96.48          | 34.1           | 29.66          |
| <b>SCAB_57751</b>    |                     |                      |                |                |                  |                   | 100               | 35.14             | 29.17          | 46.93          | 34.64          |
| <b>SCAB_77271</b>    |                     |                      |                |                |                  |                   |                   | 100               | 30.31          | 36.05          | 98.8           |
| <b>GEO1108</b>       |                     |                      |                |                |                  |                   |                   |                   | 100            | 33.9           | 30.18          |
| <b>GEO5601</b>       |                     |                      |                |                |                  |                   |                   |                   |                | 100            | 36.79          |
| <b>GEO7671</b>       |                     |                      |                |                |                  |                   |                   |                   |                |                | 100            |

**TABLE S2.** Summary of sequencing and assembly results for the RNA samples.

| Sample | Clean Reads | Q30 (%) | Mapping Ratio |
|--------|-------------|---------|---------------|
| 36h-1  | 6313294     | 96.17%  | 95.46%        |
| 36h-2  | 6842781     | 96.13%  | 97.94%        |
| 36h-3  | 5436705     | 96.26%  | 97.72%        |
| 72h-1  | 4276641     | 96.21%  | 96.72%        |
| 72h-2  | 6796329     | 96.38%  | 94.90%        |
| 72h-3  | 4974938     | 96.19%  | 96.43%        |
| 120h-1 | 6549152     | 96.05%  | 93.73%        |
| 120h-2 | 6307468     | 96.10%  | 94.60%        |
| 120h-3 | 8986765     | 96.39%  | 98.00%        |

**TABLE S3.** Primers used in this study. The restriction sites are underlined.

| Primers                | Sequence (5'→3')                | Description           |
|------------------------|---------------------------------|-----------------------|
| 1108F ( <i>Nde</i> I)  | CCCATATGGTGGGCTCGGATTCC         | Gene Cloning          |
| 1108R ( <i>Xho</i> I)  | CCCTCGAGTCAGTTCACCCCCT          |                       |
| 5601F ( <i>Nde</i> I)  | CCCATATGATGGACGGCGGCTC          |                       |
| 5601R ( <i>Bam</i> HI) | CGGGATCCTCACTGGCCGAGCACGT       |                       |
| 7671F ( <i>Nde</i> I)  | CCCATATGATGGAGGGCGATGC          |                       |
| 7671R ( <i>Xho</i> I)  | CCCTCGAGTCACTTCAGCGAGTCCA       | Gene Knockout         |
| 5601①F                 | CGGGATCCTCGGCTCCGGCGCCCGCTGC    |                       |
| 5601①R                 | GGAGGACGCACCAGCTCCAAAGAGGCACTC  |                       |
| 5601②F                 | TTGGAGCTGGTGCCTCCTGATGCCC       |                       |
| 5601②R                 | CCAAGCTTCAGATCCGGGAGCGGGTCGT    |                       |
| 7671①F                 | CGGGATCCCTGCGCGACCTCTGCCGACGT   |                       |
| 7671①R                 | ACTGGGACCTCATCGGTGGACAGGGCGAATT |                       |
| 7671②F                 | TCCACCGATGAGGTCCCAGTCGTGCAGC    |                       |
| 7671②R                 | CCAAGCTTATGGCCTCGACGACATC       |                       |
| 5601①VF                | ACAGCAGCACGAACACCAGC            | Knockout Verification |
| 5601①VR                | CAGCCCGATAACCGAAGACA            |                       |
| 7671①VF                | CGAGGATGAAGGTGAAGTTGTC          |                       |
| 7671①VR                | TCTGGGCTGCCTGGTAGTGC            |                       |
| 5601F                  | CCTTCGGAGTCTTCGGCTA             | qRT-PCR               |
| 5601R                  | AGTAGACCGAGGTCTTGG              |                       |
| 7671F                  | GACCAGTACGAGGTGCTCTG            |                       |
| 7671R                  | TCGTAGATGTTCCGGAGGTC            |                       |

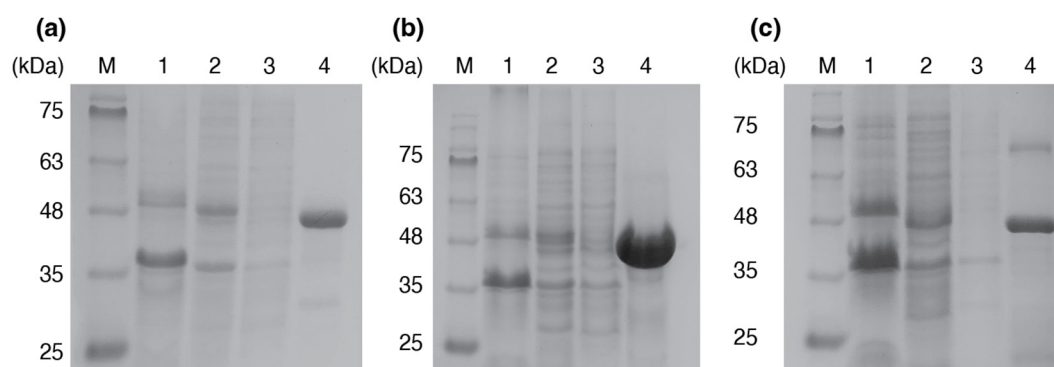

**FIGURE S1** SDS-PAGE spectrums of the purification process of three putative CebE protein of CebE<sup>1108</sup> **(a)**, CebE<sup>5601</sup> **(b)**, and CebE<sup>7671</sup> **(c)**. Lane M, marker; Lane 1, crude enzyme extract; Lane 2, inclusion body; Lane 3, effluent from the washing process; Lane 4, elution by 500 mM imidazole.

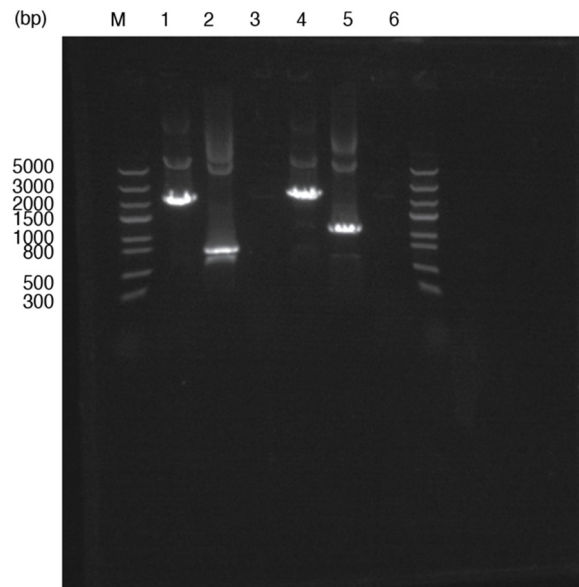

**FIGURE S2** PCR verification of the in-frame deletion *Streptomyces* mutants  $\Delta$ *GEO5601* and  $\Delta$ *GEO7671*. Lane M, marker; Lane 1, positive control of *GEO5601* (2046 bp); Lane 2, mutant that only carrying the deleted *GEO5601* fragment (688 bp); Lane 3, negative control with no template supplementation; Lane 4, positive control of *GEO7671* (2272 bp); Lane 5, mutant that only carrying the deleted *GEO7671* fragment (1063 bp); Lane 6, negative control with no template supplementation.

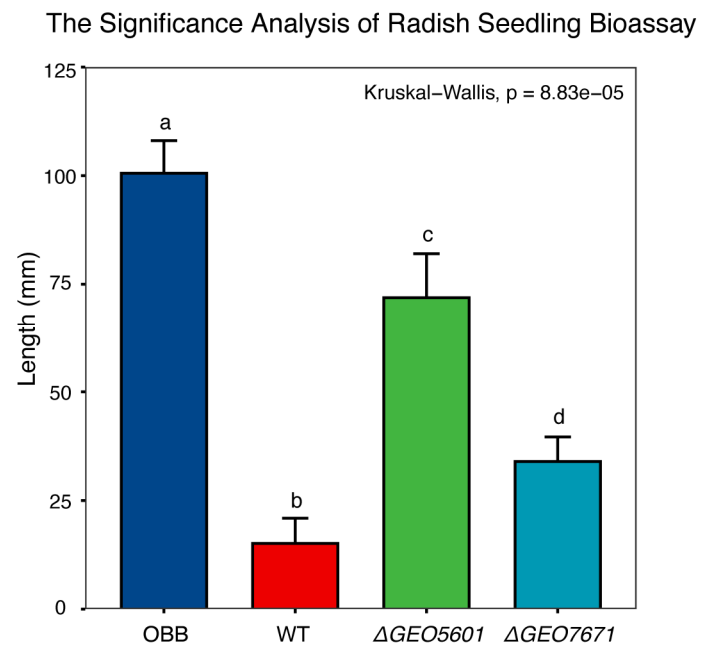

**FIGURE S3** The significance analysis of radish seedling bioassay.
